# Supplementary material for: The Effect of a Neuronal Nitric Oxide Synthase Inhibitor on Neurovascular Regulation in Humans
Source: PubMed Central journal article supplement (PMC9770134; doi:10.1161/circresaha.122.321631), 2022-11-09
Supplement: res-131-0952-s001.pdf [file res-131-0952-s001.pdf]

## **Supplemental Materials**

### **The effect of a neuronal nitric oxide synthase inhibitor on neurovascular regulation in humans**

#Kevin O’Gallagher<sup>1,2</sup>, #Ryan E. Rosentreter<sup>3</sup>, Jan Elaine Soriano<sup>3</sup>, Ali Roomi<sup>1,2</sup>, Saqib Saleem<sup>4</sup>, Tyler Lam<sup>3</sup>, Roman Roy<sup>1</sup>, Grant R. Gordon<sup>3</sup>, Satish R. Raj<sup>3</sup>, Philip J. Chowienczyk<sup>1,2</sup>, &Ajay M. Shah<sup>1,2†</sup>, &Aaron A. Phillips<sup>3†</sup>

<sup>1</sup> School of Cardiovascular and Metabolic Medicine & Sciences, King’s College London British Heart Foundation Centre of Research Excellence, London, UK.

<sup>2</sup> NIHR Biomedical Research Centre, Clinical Research Facility, Guy’s and St Thomas NHS Foundation Trust, London, UK.

<sup>3</sup> Departments of Physiology and Pharmacology, Clinical Neurosciences, Cardiac Sciences, Hotchkiss Brain Institute, Libin Cardiovascular Institute of Alberta, Cumming School of Medicine, University of Calgary, Alberta, Canada.

<sup>4</sup> Department of Electrical and Computer Engineering, COMSATS University, Sahiwal, Pakistan.

# Equal contribution  
& Equal contribution

† Correspondence:

Aaron A. Phillips, [aaron.phillips@ucalgary.ca](mailto:aaron.phillips@ucalgary.ca), (403) 220-5672, Heritage Medical Research Building 93, 3330 Hospital Dr NW, Calgary, AB, Canada, T2N 4N1.

Ajay M. Shah, [ajay.shah@kcl.ac.uk](mailto:ajay.shah@kcl.ac.uk), 0044 20 7848 5189, The James Black Centre, 125 Coldharbour Lane, London, SE5 9NU, United Kingdom.

## **Contents**

Table S1. Participant characteristics

Table S2. NVC results

Table S3. Coefficient of Variation data

Table S4. Shapiro-Wilk Normality data

Figure S1. Study Participation

Figure S2. Test-retest reliability

Figure S3. Analysis of sex-based differences

Figure S4. Analysis of association between haemodynamic conditions and NVC effects.

Major Resources Table

| <b>Participant number</b> | <b>Age</b>    | <b>Weight (kg)</b> | <b>Height (cm)</b> | <b>Sex</b>   | <b>Ethnicity</b> |
|---------------------------|---------------|--------------------|--------------------|--------------|------------------|
| 001                       | 36            | 63                 | 165                | F            | Caucasian        |
| 002                       | 26            | 70                 | 178                | M            | Caucasian        |
| 004                       | 24            | 65                 | 160                | F            | Caucasian        |
| 007                       | 42            | 70                 | 167                | F            | South Asian      |
| 009                       | 18            | 65                 | 165                | F            | Caucasian        |
| 010                       | 28            | 73                 | 178                | M            | Caucasian        |
| 011                       | 24            | 56                 | 165                | F            | Caucasian        |
| 012                       | 21            | 54                 | 161                | F            | East Asian       |
| 013                       | 25            | 53                 | 160                | F            | East Asian       |
| 014                       | 34            | 89                 | 174                | M            | South Asian      |
| 015                       | 26            | 64                 | 173                | M            | Caucasian        |
| 016                       | 25            | 82                 | 180                | M            | East Asian       |
| Mean (SD)                 | 27.4<br>(6.7) | 67.0 (10.8)        | 168.8 (7.4)        | (7 F,<br>5M) |                  |

**Table S1** Participant characteristics

|                              | Placebo control |          | SMTC     |           | Pressor control |          |
|------------------------------|-----------------|----------|----------|-----------|-----------------|----------|
|                              | Pre             | Post     | Pre      | Post      | Pre             | Post     |
| MAP (%)                      | -0.23±0.4       | 0.15±0.5 | 0.17±0.6 | -0.68±0.4 | 0.37±0.6        | 0.67±0.3 |
| Mean PCAv (%)                | 8.1±0.6         | 8.8±0.5  | 7.6±1.0  | 6.7±1.0   | 6.82±0.6        | 8.10±0.7 |
| Peak PCAv (%)                | 19.0±0.7        | 20.9±1.1 | 19.1±2.0 | 17.0±1.9  | 17.4±1.3        | 19.5±1.7 |
| PCA PI (%)                   | -1.9±0.6        | -2.2±0.5 | -2.1±0.8 | -2.5±0.9  | -1.9±1.0        | -3.1±0.6 |
| PCA PR (%)                   | -3.5±0.5        | -2.4±0.8 | -3.0±0.5 | -2.1±0.4  | -3.1±0.6        | -3.0±0.5 |
| Time to peak (s)             | 18.8±2.4        | 16.2±2.4 | 19.1±1.9 | 15.5±2.6  | 15.4±2.1        | 14.1±2.2 |
| Time to max slope (s)        | 5.7±0.7         | 7.3±1.7  | 5.5±0.5  | 6.1±0.5   | 5.3±0.2         | 4.9±0.1  |
| Mean PCAv 0-5s (%)           | 5.5±0.8         | 7.2±0.5  | 5.6±0.9  | 4.5±0.9   | 4.7±0.8         | 7.3±0.8  |
| Mean PCAv 5-10s (%)          | 13.1±0.9        | 15.2±0.9 | 13.1±1.8 | 12.2±1.6  | 12.7±1.2        | 16.2±1.4 |
| Mean PCAv slope, 0-5s (%)    | 11.4±1.0        | 13.5±1.0 | 11.4±1.0 | 13.5±1.0  | 11.2±1.2        | 14.0±1.2 |
| Max PCAv slope, 0-5s (%)     | 10.1±0.7        | 11.5±1.0 | 9.8±1.2  | 7.4±1.2   | 9.2±0.8         | 11.3±1.1 |
| Minimum PCAv slope, 0-5s (%) | 12.9±1.6        | 15.7±1.5 | 14.9±2.2 | 13.0±2.6  | 13.5±2.4        | 17.2±1.9 |

**Table S2** NVC Results

PI, pulsatility index; PR, pulse ratio; PCAv, posterior cerebral artery velocity. Data expressed as mean±SEM

| Subject               | Placebo control | SMTC         | Pressor control | Subject mean  |
|-----------------------|-----------------|--------------|-----------------|---------------|
| 1                     | 7.59%           | 8.03%        | 7.51%           | <b>7.71%</b>  |
| 2                     | 9.69%           | 10.05%       | 9.15%           | <b>9.63%</b>  |
| 4                     | 6.66%           | 8.76%        | 6.95%           | <b>7.46%</b>  |
| 7                     | 5.54%           | 6.28%        | 8.03%           | <b>6.62%</b>  |
| 9                     | 8.34%           | 7.22%        | 5.40%           | <b>6.99%</b>  |
| 10                    | 10.25%          | 10.69%       | 9.74%           | <b>10.23%</b> |
| 11                    | 5.25%           | 4.89%        | 6.72%           | <b>5.62%</b>  |
| 12                    | 6.37%           | 6.12%        | 5.59%           | <b>6.03%</b>  |
| 13                    | 8.13%           | 6.61%        | 8.27%           | <b>7.67%</b>  |
| 14                    | 6.07%           | 6.62%        | 6.22%           | <b>6.30%</b>  |
| 16                    | 9.79%           | 4.72%        | 5.36%           | <b>6.62%</b>  |
| <b>Condition mean</b> | <b>7.61%</b>    | <b>7.27%</b> | <b>7.18%</b>    |               |

**Table S3** Coefficient of Variation Data

| Variable                                     | Placebo Control      | SMTC                               | Pressor Control      |
|----------------------------------------------|----------------------|------------------------------------|----------------------|
| $\Delta$ Average PCA velocity (cm/s)         | W= 0.94<br>P= 0.53   | W= 0.93<br>P= 0.40                 | W= 0.93<br>P= 0.38   |
| $\Delta$ Average MCA velocity (cm/s)         | W= 0.92<br>P= 0.34   | W= 0.92<br>P= 0.35                 | W= 0.97<br>P= 0.85   |
| $\Delta$ PCA CVR (mmHg/cm*s <sup>-1</sup> )  | W= 0.91<br>P= 0.26   | W= 0.82<br>P= 0.020                | W= 0.96<br>P= 0.73   |
| $\Delta$ MCA CVR (mmHg/cm*s <sup>-1</sup> )  | W= 0.86<br>P= 0.060  | W= 0.61<br>P= 3.1x10 <sup>-5</sup> | W= 0.94<br>P= 0.50   |
| $\Delta$ Average PCA velocity 0-5s (%)       | W= 0.95<br>P= 0.70   | W= 0.94<br>P= 0.57                 | W= 0.96<br>P= 0.73   |
| $\Delta$ Average PCA velocity slope 0-5s (%) | W= 0.97<br>P= 0.86   | W= 0.96<br>P= 0.77                 | W= 0.94<br>P= 0.49   |
| $\Delta$ Time of max PCA slope               | W= 0.90<br>P= 0.21   | W= 0.83<br>P=0.031                 | W= 0.92<br>P= 0.38   |
| $\Delta$ iRate 1                             | W= 0.98<br>P= 0.97   | W= 0.96<br>P= 0.82                 | W= 0.94<br>P= 0.55   |
| $\Delta$ iRate 2                             | W= 0.94<br>P= 0.51   | W= 0.96<br>P= 0.81                 | W= 0.97<br>P= 0.85   |
| $\Delta$ iAmp 1                              | W= 0.97<br>P= 0.90   | W= 0.92<br>P= 0.30                 | W= 0.95<br>P= 0.61   |
| $\Delta$ iAmp 2                              | W= 0.93<br>P= 0.36   | W= 0.94<br>P= 0.48                 | W= 0.96<br>P= 0.73   |
| $\Delta$ iPulse                              | W= 0.79<br>P= 0.0070 | W= 0.84<br>P= 0.030                | W= 0.97<br>P= 0.89   |
| $\Delta$ PCA CVCi (cm/s/mmHg)                | W= 0.84<br>P=0.031   | W=0.85<br>P=0.037                  | W= 0.77<br>P= 0.0041 |
| $\Delta$ PCA CVCi (%)                        | W= 0.95<br>P= 0.70   | W= 0.93<br>P= 0.43                 | W= 0.91<br>P= 0.22   |
| $\Delta$ NVC MAP (%)                         | W= 0.86<br>P= 0.064  | W= 0.92<br>P= 0.32                 | W= 0.90<br>P= 0.16   |

**Table S4** Shapiro-Wilk Normality Data

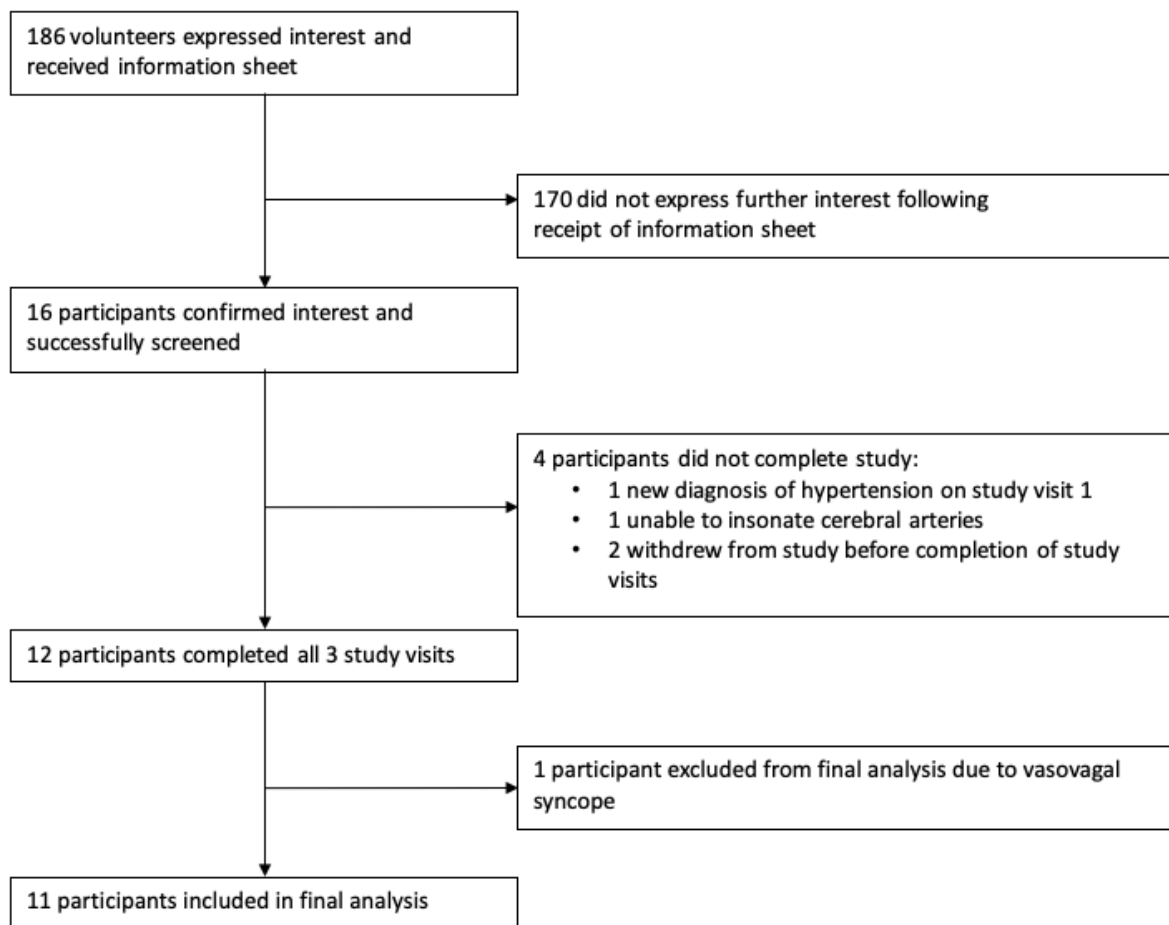

**Figure S1.** Study Participation

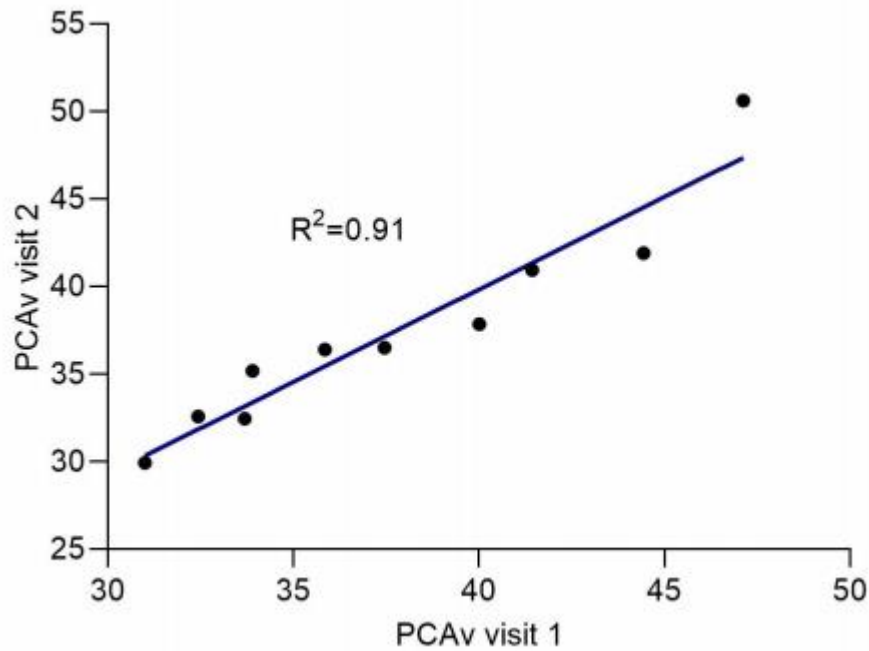

**Figure S2. Test-retest reliability**

Here we show our test-retest reliability for baseline PCA velocity values taken from 10 participants tested on 2 separate days, a minimum of 1 week apart. The evaluation of test-retest reliability using an intraclass correlation coefficient (ICC) is the preferred metric of use.<sup>49</sup> We report an ICC score of 0.951.



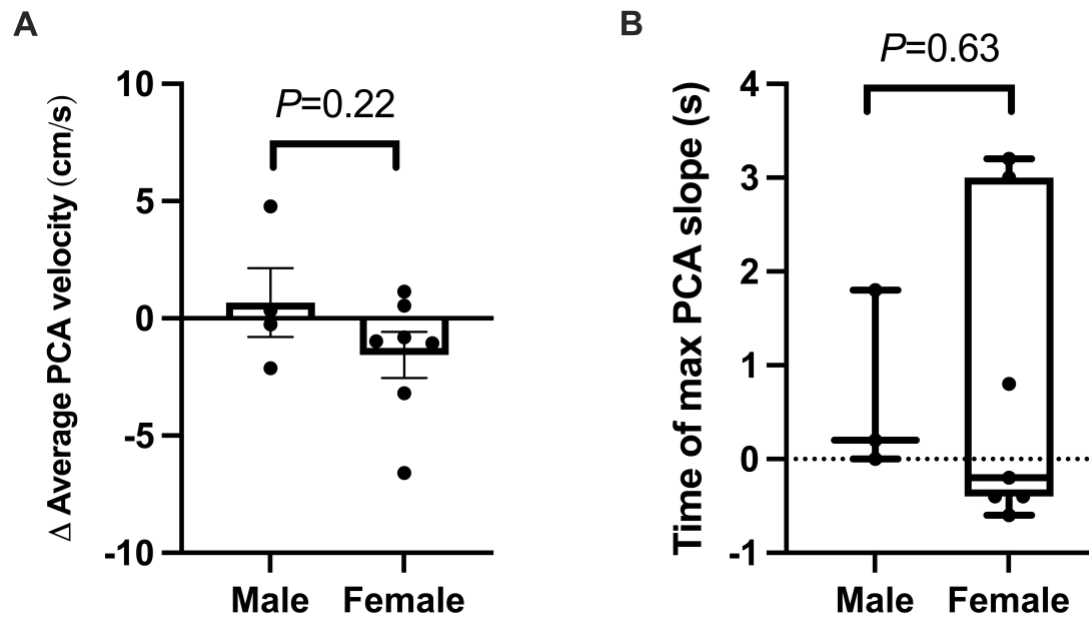

**Figure S3. Analysis of sex-based differences in PCA responses to SMTC,** as analysed by unpaired t test (panel A, mean $\pm$ SEM) or Mann-Whitney test (panel B, median (IQR)). n=11 for panel A (4 male, 7 female), n=10 for panel B (3 male, 7 female).

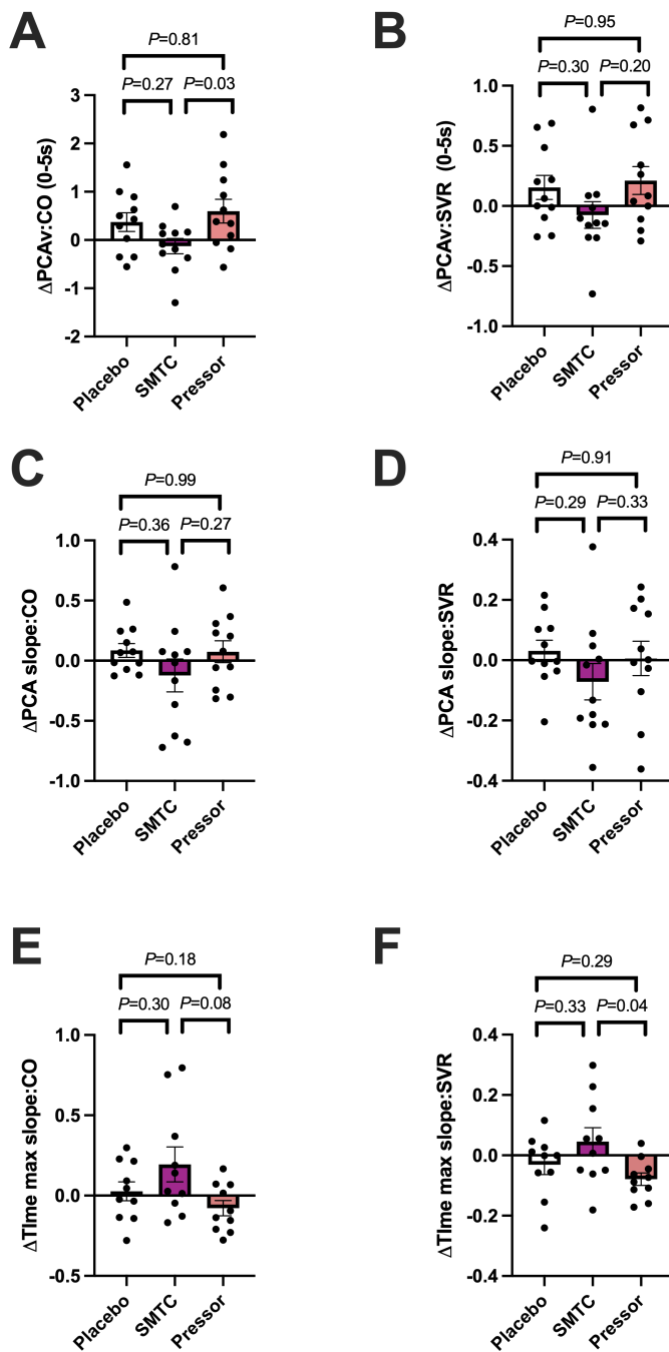

**Figure S4. Changes in neurovascular coupling velocity corrected for changes in haemodynamic conditions.** Panels A, C, E show indices corrected for CO. Panels B, D, F show indices corrected for SVR. Analysis performed using one way ANOVA and Tukey *post hoc*. Data presented as mean $\pm$ SEM. n=11, apart from panels E&F (n=10).

### Major Resources Table

| <b>Description</b>                            | <b>Source / Repository</b>                | <b>Persistent ID / URL</b> |
|-----------------------------------------------|-------------------------------------------|----------------------------|
| Study drug: S-methyl-L-thiocitrulline         | Merck Millipore, USA                      |                            |
| Study drug: Phenylephrine                     | Amdipharm UK Ltd                          |                            |
| Intellivue Brachial blood pressure monitor    | Phillips, UK                              |                            |
| Finometer NOVA Finger plethysmograph          | Finapres Medical Systems, The Netherlands |                            |
| Transcranial Doppler probes: DWL DopplerBox X | Compumedics, Singen, Germany              |                            |
| QL Monitoring Software, version 3.5.5         |                                           |                            |
| RespirAct                                     | Thornhill Research, Toronto, Canada       |                            |
| Tegaderm transparent dressing film            | 3M Healthcare, St Paul, Minnesota, USA    |                            |
| iNVC Software, Version 2.2                    | Innovate Calgary, Alberta, Canada         |                            |
